1 Production of Insoluble Starch-Like Granules in *Escherichia coli* by Modification of the  
2 Glycogen Synthesis Pathway

3

4 Joseph J. White,<sup>a\*</sup> #Natasha Cain,<sup>a</sup> and Christopher E. French<sup>a</sup>

5

6 <sup>a</sup>School of Biological Sciences, University of Edinburgh, Edinburgh, UK

7

8 Running Head: Glycogen Synthesis Modification in *E. coli*

9

10 #Address correspondence to Joseph J. White, [josephjohnwhite@protonmail.com](mailto:josephjohnwhite@protonmail.com).

11 \*Present address: Department of Molecular Evolution, Centro de Astrobiología (CSIC-

12 INTA), 28850 Torrejón de Ardoz (Madrid)

13

14

15 Keywords: biofuel; glycogen; polysaccharide; ADP-glucose pyrophosphorylase; glgC

16 **Abstract**

17           While investigating the conversion of cellulosic biomass to starch-like materials  
18 for industrial use, it was observed that the overexpression of native ADP-glucose  
19 pyrophosphorylase GlgC in *Escherichia coli* led to the formation of insoluble  
20 polysaccharide granules within the cytoplasm, occupying a large fraction of the cell  
21 volume, as well as causing an overall increase in cellular polysaccharide content. TEM  
22 microscopy revealed that the granules did not have the lamellar structure of starch, but  
23 rather an irregular, clustered structure. On starvation, cells overexpressing GlgC  
24 appeared unable to fully degrade their polysaccharide material and granules were still  
25 clearly visible in cultures after 8 days of starvation. Interestingly, the additional  
26 overexpression of the branching enzyme GlgB eliminated the production of granules  
27 and led to a further increase in cellular polysaccharides. GlgC is generally thought to be  
28 responsible for the rate-limiting step of glycogen synthesis. Our interpretation of these  
29 results is that excess GlgC activity may cause the elongation of glycogen chains to  
30 outpace the addition of side branches, allowing the chains of adjacent glycogen  
31 molecules to reach lengths at which they spontaneously intertwine, forming dense  
32 clusters that are largely inaccessible to the host. However, upon additional upregulation  
33 of the GlgB branching enzyme, the branching of the polysaccharide is able to keep  
34 speed with the synthesis of linear chains, eliminating the granule phenotype. This study  
35 suggests potential avenues for increasing bacterial polysaccharide production and  
36 recovery.

37

38 **Importance**

39           In this work, the polysaccharide stores of *Escherichia coli* were altered through  
40 the addition of extra copies of the bacteria's own polysaccharide synthesis genes. In this  
41 way, bacteria were created that produced over twice the level of storage polysaccharide  
42 as a control strain, in the form of a granule that could potentially facilitate easy harvest.  
43 Another form of mutant *Escherichia coli* was created that produced over seven times  
44 the normal level of storage polysaccharide, and also grew to higher cell densities in  
45 liquid culture. In addition to increasing our understanding of glycogen synthesis, it is  
46 proposed that similarly modified bacteria, grown on inexpensive waste materials, may  
47 be a useful source of starch-like polysaccharides for industrial or agricultural use. In  
48 particular, the use of cyanobacterial glycogen as a carbon source for biofuels has  
49 recently been gaining interest, and the work presented here may well be applicable in  
50 this field.

51

## 52 **Introduction**

53           Starch granules accumulated by plant cells form the basis of a large part of the  
54 human food supply, and are a valuable resource in many industries, including paper and  
55 biofuels. Recent years have seen enormous volumes of grain diverted to bioethanol  
56 production; reportedly, in 2013-2014, 40% of the US maize crop was used for biofuel  
57 production (1). According to some reports, this was a factor in the food price riots in  
58 many parts of the world in 2008 (2, 3). Furthermore, it has been suggested that the land  
59 clearance necessary for growing crops used as biofuel may produce more CO<sub>2</sub>  
60 emissions than are saved through the reduction of fossil fuel use (4, 5).

61           Whether or not all this is the case, it is clear that as the human population  
62 increases, it will be increasingly unacceptable to divert human-grade food materials to

63 non-food uses. Thus, a non-food based source of starch-like polymers is required. One  
64 current plan to reduce diversion of food materials would appear to be a gradual change  
65 to ‘second generation’ biofuels, such as ethanol generated directly from abundant  
66 cellulosic waste material by genetically modified strains of *Saccharomyces cerevisiae*,  
67 *Escherichia coli*, or other organisms such as *Geobacillus thermoglucosidasius* (6–11).  
68 Despite the expenditure of vast resources, and significant government subsidies and  
69 other incentives, cellulosic ethanol production currently remains at a rather small scale.  
70 One apparently unexplored alternative would be conversion of sugars from cellulosic  
71 material to an easily degradable starch-like form, which could be incorporated into the  
72 current, very large scale grain-based ethanol production system. Such a two-stage  
73 process might have significant advantages in terms of process kinetics, since conversion  
74 of cellulosic biomass to sugars is unavoidably a ‘slow’ step compared to fermentation of  
75 sugars to ethanol. Initial slow conversion of cellulosic polymers to an insoluble but  
76 easily degradable starch-like material, which can be easily recovered from the  
77 fermentation medium, washed, transported, and stored for later use, followed by rapid  
78 saccharification and fermentation using standard, highly efficient processes, may alter  
79 the economics of cellulosic ethanol production. In addition, microbial starch-like  
80 polymers may also be useful in other industries, and might even be able to partially  
81 substitute for the use of grain in feeding livestock, thus freeing up more grain for human  
82 food use.

83 For these reasons the production of insoluble starch-like polymers has been  
84 investigated in bacteria. In general the production of true starch is limited to plants and  
85 green and red alga, though it has now also been identified in at least one strain of  
86 subgroup V diazotrophic cyanobacteria (12, 13). Common bacteria such as *Escherichia*

87 *coli* produce glycogen, which has a similar structure to the amylopectin fraction of  
88 starch, that is to say  $\alpha$ -1,4-linked glucose chains with  $\alpha$ -1,6-linked side branches, but  
89 with a higher branching level of around 9%. The branching level of amylopectin is  
90 below 6% and occurs discontinuously, in tiers, thereby creating alternating amorphous  
91 and crystalline lamella (14, 15). The crystalline lamella are likely composed of  
92 unbranched glucan chains around 12 to 20 glucosyl residues in length, that  
93 spontaneously pair together forming double helices with their neighbours, while the  
94 amorphous lamella are thought to be the recurrent regions of the molecule that contain  
95 the branch points, and as such are prevented from forming helices by the interference of  
96 the  $\alpha$ -1,6-bonds. It is further supposed that the double-helices of the crystalline lamella  
97 twist into superhelices, although the details of this have yet to be elucidated (16–18).

98         The amylose fraction generally makes up around 15% of the starch crystal in the  
99 Chloroplastida and is thought to be interspersed within the amorphous lamella of the  
100 amylopectin, although its exact location is still under debate (19, 20). It is far simpler  
101 than amylopectin, being mostly unbranched chains of  $\alpha$ -1,4 linked glucosyl residues. It  
102 is also far smaller, with molecular weight estimates varying between  $10^5$  and  $10^6$   
103 Daltons (18). Because of its sparsity of branches, amylose twists itself into single  
104 helices, with each coil of the helix thought to be 6 glucosyl residues long (21).

105         Iodine is often used in the colourimetric assaying of starch, and it is the single  
106 helices of the amylose fraction that react to form the intense blue-black colour typical of  
107 this assay. The resulting colour depends on the length of the helix-iodine complex,  
108 going from brown to red to blue with increasing length (20, 22, 23). Amylopectin also  
109 stains with iodine solution, though with a much lower affinity (<1%, compared to  
110 around 20% with amylose) since iodine does not complex with the double-helices of the

111 crystalline lamella. The amylopectin-iodine complex therefore tends to be very pale,  
112 with a reddish-purple colour. Glycogen, meanwhile, generally forms a deep red  
113 complex with iodine, suggesting an abundance of shorter single helices, although this  
114 varies considerably among different sources due to glycogen's lower structural  
115 organisation (24).

116         Due to the high branching level of glycogen, its granules are thought to be  
117 limited in size to around 42 nm diameter by steric considerations, and are highly  
118 soluble, whereas starch granules, with their tiered growth, may be hundreds of  
119 micrometres in diameter and are insoluble, providing a denser energy store (25, 26). The  
120 main chains of glycogen are synthesised by glycogen synthase (GlgA), which adds  
121 sugar residues in the form of ADP-glucose, produced from glucose-1-phosphate and  
122 ATP by ADP-glucose pyrophosphorylase (GlgC). The activity of GlgC is therefore  
123 generally considered to be the first committed step and also the rate-limiting step in  
124 glycogen synthesis (14). Meanwhile, the  $\alpha$ -1,6-linked side chains are added by  
125 branching enzyme GlgB, which cleaves about four residues of a chain off the terminal  
126 end and attaches them to the 6-hydroxyl of a residue further down the chain. The highly  
127 branched structure of glycogen allows optimum accessibility of glucose residues to the  
128 degradative enzymes glycogen phosphorylase (GlgP) and glycogen debranching  
129 enzyme (GlgX) (27) (figure 1).

130 To investigate the possibility of converting bacterial glycogen to an insoluble starch-like  
131 form for easy recovery and processing, this research initially sought to upregulate  
132 glycogen production. In line with the idea that GlgC catalyses the rate-limiting step of  
133 glycogen synthesis, it is known that the upregulation of glycogen production can be  
134 accomplished by the overexpression of GlgC, or more particularly, a mutant form,

135 GlgC16 (G335D), which is resistant to normal feedback inhibition by AMP (28).  
136 However, on overexpression of GlgC in *E. coli* MG1655 JM109, we observed large  
137 insoluble bodies within the cells, apparently composed of glucose polymers. To the best  
138 of our knowledge, this phenomenon has not previously been reported, although  
139 glycogen synthesis has been extensively studied. Here the preliminary characterization  
140 of these inclusions is described.

141

## 142 **Results**

143 In order to create cells with a higher polysaccharide content, GlgC and GlgC16 were  
144 overexpressed in *Escherichia coli* JM109 from a high copy number plasmid, pSB1C3,  
145 using a *lac* promoter (pJW-glgC and pJW-glgC16, respectively). The same plasmid  
146 with *lac* promoter and *lacZ'* alone (pJW-lacZ) was used as a control (table 3). Cells  
147 bearing pJW-glgC or pJW-glgC16 grown in the presence of lactose were found to  
148 contain higher levels of polysaccharide than controls as expected and, correspondingly,  
149 to stain a darker colour with iodine (figure 2). Cells were treated with CuSO<sub>4</sub> and H<sub>2</sub>O<sub>2</sub>  
150 in order to stabilise the colour change with iodine (29). The effect of this treatment on  
151 the intensity of staining of starch-iodine reactions was investigated to ensure it did not  
152 interrupt the linear trend of colour intensity to polysaccharide content, and was found  
153 not to interrupt this linearity.

154 Unexpectedly, cells transformed with either pJW-glgC or pJW-glgC16 were also  
155 found to contain large inclusions, clearly visible under phase contrast microscopy,  
156 which were absent in cells containing a control plasmid. These inclusions stained darkly  
157 with iodine against the unstained cell body, appearing vivid blue under phase contrast  
158 (figure 2B) or brown under light-field microscopy (not shown). The iodine-staining

159 material was also seen to be present in the cell debris rather than the soluble fraction  
160 (figure 2B). SDS-PAGE analysis showed no large new bands in the cytoplasm or cell  
161 debris compared to controls, indicating that the inclusions were not composed of  
162 misfolded protein.

163 It was hypothesised that an increased supply of ADP-glucose provided by the  
164 upregulation of *glgC* allowed glycogen synthase activity to reach a previously  
165 unrealised potential and outstrip the activity of the branching enzyme. To test this  
166 hypothesis pJW-glgCB was constructed, bearing *glgC* followed by *glgB*, both under the  
167 control of the *lac* promoter (table 3). In line with the prediction, *E. coli* JM109/pJW-  
168 glgCB produced increased levels of polysaccharide compared to the control, although  
169 unexpectedly the increase was found to be far greater still than for those cells  
170 transformed with the additional *glgC* alone (figure 3A). Also in line with predictions,  
171 cells transformed with pJW-glgCB were seen to stain the typical red-brown of glycogen  
172 in reaction with iodine (figure 3, B and C) and did not contain visible inclusions by light  
173 microscopy. All cultures were analysed by transmission electron microscopy, where  
174 both of the novel transformants showed a marked phenotype different from controls  
175 (figure 4). The inclusions found in *E. coli* JM109/pJW-glgC cells were seen to have a  
176 granular internal structure. Cells transformed with pJW-glgCB were seen to contain an  
177 abundance of inclusive matter dispersed throughout the cells. In the case of both  
178 transformants, the inclusive matter was observed in around a third of cells.

179 It was also observed that *E. coli* JM109/pJW-glgCB cultures reached higher  
180 densities than those of the control. To investigate this further, growth curves were  
181 obtained for the different transformants in both LB and modified Kornberg medium,  
182 substituted with lactose and IPTG (figure 5). *E. coli* JM109/pJW-glgCB showed slower



183 initial growth than the control for the first five hours growth in LB, but then continued  
184 to increase in cell density and plateaued at a higher density than any of the other  
185 transformants. Cells transformed with pJW-glgC showed an even slower initial growth  
186 rate, only reaching the same density as the control after around eight hours growth in  
187 LB, and were never seen to exceed the cell density of the control in this medium. A  
188 similar pattern was seen in the modified Kornberg medium, although all cultures  
189 reached a higher final density and the differences between final culture densities were  
190 less clear. Cells transformed with pJW-glgB showed an almost identical growth curve to  
191 the control in all circumstances.

192 It was subsequently tested whether the polysaccharides were accessible to cells  
193 under starvation conditions. Cultures of all transformants were grown to the same  
194 optical density in a way that was expected to maximise their polysaccharide content,  
195 before the cells were washed and resuspended in minimal medium without added  
196 carbon source. Culture density readings were taken at intervals over 216 hours, while  
197 anthrone assays were performed on aliquots of the cultures at the same time points to  
198 determine how much of the polysaccharide present in the original cell pellets was  
199 metabolized over time (figure 6, A and B). All cultures showed a decrease in culture  
200 density and polysaccharide content. In line with expectations, *E. coli* JM109/pJW-glgC  
201 showed a much greater reduction in culture density than the control over this time, and  
202 was never observed to fully deplete their polysaccharide stores. However, the greatest  
203 reduction in culture density was seen in *E. coli* JM109/pJW-glgCB. Furthermore, these  
204 cultures were also never able to fully deplete their polysaccharide stores, even when the  
205 experiment was repeated over 264 hours to clarify ambiguous results (figure 6C). In all  
206 cases *E. coli* JM109/pJW-glgB was once again observed to behave in a way similar to

207 the control. Protein assays were performed on all cultures for the final two time points  
208 of the starvation experiment and were seen to corroborate the optical density readings.  
209 Cultures were also observed under light microscopy after staining with iodine at each  
210 time point of the starvation experiment. Inclusion bodies were observed at a similar  
211 ratio within the *E. coli* JM109/pJW-glgC cells throughout the course of both  
212 experiments (Figure 7).

213

## 214 **Discussion**

215 This work showed that the transformation of *E. coli* MG1655 JM109 with additional  
216 copies of its native *glgC*, expressed on a high copy number plasmid under a *lac*  
217 promoter, led to the formation of inclusion bodies within the cells when they were  
218 grown in culture supplemented with lactose and IPTG. Inclusion bodies were also  
219 observed in the same transformants when grown in media supplemented with glucose in  
220 place of lactose, although to a lesser extent, which is thought to be due to the inhibitory  
221 effect of glucose on the *lac* promoter (data not shown). The same ‘inclusion body’  
222 phenotype was not observed in cells transformed with the same plasmid but lacking  
223 *glgC*, under any of the growth conditions tested. When present, inclusion bodies were  
224 observed to stain a deep brown in reaction with iodine, suggestive of an abundance of  
225 single-helices shorter than those found in glycogen, which tends to stain red. SDS-  
226 PAGE analysis of the *E. coli* JM109/pJW-glgC16 cells suggested that the inclusions  
227 observed were not composed of a single over-expressed protein.

228 Anthrone assays performed on transformants in this work have been consistent  
229 in showing a higher hexose sugar content for *glgC16* and *glgC* transformed cells than  
230 for a control. It was hypothesised that, since GlgC activity normally performs the rate-

231 limiting step of glycogen synthesis, upregulating its expression in JM109 *E. coli* grown  
232 in sugar-rich media leads to the appearance of inclusion bodies in many of the cells, as  
233 well as a higher average intracellular concentration of sugar than in a control group  
234 grown under the same conditions, because GlgC increases the substrate availability for  
235 GlgA, the glycogen synthase. This increased substrate is thought to allow the glycogen  
236 synthase to meet a previously unrealised potential and synthesise the linear glucan  
237 chains within the polysaccharide granule at a faster rate than GlgB can add branches to  
238 them, so that they grow long unbranched chains able to spontaneously form double-  
239 helices, and that this interweaving of adjacent chains is causing the aggregation of  
240 granules into the large inclusion bodies observed. These double-helices would not bind  
241 iodine. However, since overall polysaccharide content is also increased approximately  
242 twofold by this manipulation, we suggest that it also leads to the appearance of  
243 abundant short single helices, giving the deep brown stain observed. The granular  
244 internal structure observed in the inclusions under TEM, which are unlike the lamellar  
245 structure seen in starch granules, also supports the hypothesis that they are formed of  
246 clustered glycogen-like polysaccharides.

247         If this hypothesis were correct, it was thought that the addition of *glgB* to the  
248 same plasmid as *glgC* would allow the branching of the polysaccharide to keep speed  
249 with the synthesis of linear chains. This was expected to stop the formation of inclusion  
250 bodies, since unbranched regions of glucan chains would no longer be able to grow long  
251 enough to wind together into double-helices, and furthermore the steric interference  
252 caused by the dense packing of glucan branches, which theoretically limits the growth  
253 of native glycogen granules, would be reintroduced. However, the cells were still  
254 expected to show the high sugar content seen in those transformed with *glgC*, since the

255 glycogen synthase would still be able to synthesise chains at the increased rate. All  
256 these phenotypes were observed, with the added observation that, rather than  
257 synthesising the same high levels of polysaccharide as the *glgC* transformed cells, those  
258 transformed with both *glgC* and *glgB* showed more than double their total sugar  
259 content.

260 Furthermore, this work has shown that *E. coli* JM109/pJW-glgCB grow to a  
261 significantly higher culture density than *E. coli* JM109/pJW-lacZ grown under the same  
262 conditions. However, contrary to predictions, they have also proved to be far more  
263 vulnerable when exposed to starvation conditions, with culture densities dropping to  
264 less than one third of the control after nine days (the optical density readings that led to  
265 this conclusion correlate well with protein assays from the same cultures, suggesting  
266 they give an accurate measure of biomass rather than, for example, being an artefact of  
267 increased light scattering caused by the inclusion bodies). The excess storage sugar is  
268 therefore perhaps an added stress to these cells under such conditions. *E. coli*  
269 JM109/pJW-glgC were also more vulnerable to starvation conditions than the *E. coli*  
270 JM109/pJW-lacZ control, and also showed the slowest growth rate of any of the  
271 transformants. If indeed the inclusion bodies accumulated during prior growth in  
272 carbon-rich media are formed of polysaccharides, it seems as though these  
273 transformants were incapable of digesting them. The presence of inclusion bodies  
274 within *E. coli* JM109/pJW-glgC transformants at the beginning and end of the starvation  
275 period is felt to support this hypothesis. Although further testing is needed, these  
276 findings could have implications for the synthesis of polysaccharides for industry, since  
277 large inclusion bodies that the bacteria are unable to digest should be easier to harvest  
278 than native glycogen granules.

279 Starvation experiments additionally seemed to suggest that *E. coli* JM109/pJW-  
280 glgCB contained hexose sugars it was unable to digest, since anthrone assays for this  
281 transformant showed its total hexose sugar content level off at around the same  
282 concentration as that of the *E. coli* JM109/pJW-glgC. No inclusion bodies are observed  
283 in these cells under the microscope, although the cells show a dense concentration of  
284 inclusive matter under TEM. This is presumed to be glycogen. It is not clear why these  
285 transformants are unable to fully digest their hexose sugar content.

286 *E. coli* lack the dikinases (Glucan Water Dikinase and Phosphoglucan Water  
287 Dikinase) that are thought to aid in starch degradation by starch metabolising  
288 organisms, possibly by prising the  $\alpha$ -1,4 linked glucan chains out of their double-helices  
289 in order to make them accessible to water soluble enzymes such as phosphorylase and  
290 debranching enzyme (GlgP and GlgX, respectively, in *E. coli*) (30, 31). Therefore the  
291 addition of *gwd* and *pwd* to the battery of transgenes expressed in these cells may allow  
292 for the digestion of the inclusion bodies. If so, this would support the theory that the  
293 additional *glgC* is leading to the growth of longer unbranched regions of glucan chains,  
294 which then spontaneously twist into double-helices with adjacent chains, causing an  
295 aggregation of polysaccharide.

296 In summary, this work demonstrates that simple modifications to the native  
297 glycogen synthesis machinery in *E. coli* can lead to the production of insoluble  
298 polysaccharide granules which appear indigestible under starvation conditions. Such  
299 polysaccharides may be easily recovered from culture media, and as such might  
300 represent a useful industrial method for capturing sugars released from cellulosic  
301 materials, in a form which can easily be converted to glucose for subsequent processing  
302 to generate biofuels or chemical feedstocks. Such 'pseudo-starch', if generated from

303 non-digestible biomass or waste sugar materials, may also be tested as feed supplement  
304 for livestock, potentially releasing large amounts of grain for human food use.

305

## 306 **Materials and Methods**

307 **Chemical transformation:** *E. coli* JM109 competent cells were prepared and  
308 transformed as described by Chung et al. (32).

309 **Growth to maximise polysaccharide content:** Overnight cultures (grown in LB (table  
310 1), 37 °C, 200 rpm) were diluted 1:100 and grown to exponential growth phase (0.5 –  
311 0.6 OD<sub>λ600nm</sub>) in modified Kornberg Medium (table 1) with appropriate selection at 37  
312 °C and 200 rpm. Cultures were then supplemented with Isopropyl β-D-1-  
313 thiogalactopyranoside (IPTG) to 1 mM in order to induce P<sub>lac</sub>, and incubated for a  
314 further 20 hours at 22 °C and 200 rpm. They were then centrifuged at 3000 ×g for 15  
315 minutes at room temperature, the supernatant was discarded and the pellet washed with  
316 M9 ×1 solution (table 1). Cell pellets were then resuspended in M9 medium with IPTG  
317 (90 mg/l), chloramphenicol (40 mg/l) and lactose (20 g/l) and incubated for a further 4  
318 hours at 37 °C and 200 rpm (modified from Sundberg et al., 33). Cultures could then be  
319 spun down at 3000 ×g for 15 minutes at room temperature, washed twice in PBS (table  
320 1) and equalised for optical density at 600nm, prior to analysis.

321 **Growth Curves:** Three overnight cultures of LB with chloramphenicol (40 mg/l) were  
322 set up for each transformant under investigation, each inoculated with a different colony  
323 from a transformation plate. They were incubated overnight at 37 °C and 200 rpm, then  
324 OD<sub>λ600nm</sub> equalised to 3.0 (± 0.09). From each overnight culture, 100 µl was used to  
325 inoculate fresh 10 ml cultures of: LB with IPTG (90 mg/l), chloramphenicol (40 mg/l)  
326 and lactose (20 g/l) and Kornberg medium with IPTG (90 mg/l), chloramphenicol (40

327 mg/l) and lactose (20 g/l). The cultures were shaken to mix before 100  $\mu$ l aliquots were  
328 transferred from each fresh culture into the wells of a Costar 3628 flat-bottom 96-well  
329 plate in a pattern designed to randomize culture distribution and eliminate edge-effect.  
330 The remaining wells surrounding the culture samples were filled with 100  $\mu$ l of sterile  
331 media. In the first instance, 100  $\mu$ l was transferred from each culture to a 96 well plate  
332 twice, using two separate plates that were run simultaneously. In the second instance,  
333 only one aliquot was transferred from each culture, so that a single plate was used. The  
334 96-well plates were incubated in a Tecan Sunrise Microplate Absorbance Reader  
335 30041769 at 37 °C and ‘normal’ shaking (4.4 mm, 9.2 Hz). Optical density readings  
336 were taken every 15 minutes for 24 hours using the ‘accuracy’ measurement mode. At  
337 the same time, the remaining 9.98 ml cultures were incubated at 37 °C and 200 rpm.  
338 Optical density readings were taken from these cultures every two hours for the first 14  
339 hours, then at 24 hours. Each optical density reading was obtained by mixing 100  $\mu$ l of  
340 culture with 900  $\mu$ l of sterile medium in a standard cuvette, then measuring the  
341  $OD_{\lambda 600nm}$  against 1 ml sterile medium on a Modulus Single Tube Multimode Reader  
342 (Turner Biosystems BS040271) fitted with Absorbance Module E6076.  
343 **Light Microscopy:** For each culture, 10  $\mu$ l was heat-fixed onto a microscope slide. The  
344 heat-fixed smear was soaked in 20  $\mu$ l of 5 % Lugol’s iodine (table 1) for 2 minutes, then  
345 rinsed with an excess of 100 % ethanol. Slides were viewed with a Nikon eclipse E200  
346 tabletop microscope under phase contrast at 1000 $\times$  magnification. Light microscopy  
347 images were obtained using a Canon 1XUS9501S digital camera directly through the  
348 microscope eyepiece. All images are considered typical of the cultures.  
349 **Transmission Electron Microscopy:** For each strain, two 50 ml cultures were grown  
350 overnight in LB with IPTG (90 mg/l), chloramphenicol (40 mg/l) and lactose (10 g/l) at

37 °C and 200 rpm. Entire cultures were then spun down at 6000 ×g for 10 minutes. The supernatant was discarded and the pellet washed twice in 25 ml PBS. The cell suspension was then spun down again at 6000 ×g for 10 minutes, the supernatant discarded and the pellet finally re-suspended in 5 ml PBS. From each culture, 1 ml was then transferred to a microcentrifuge tube. These were centrifuged at 6000 ×g for 10 minutes at room temperature and fixed in 3 % glutaraldehyde in buffer C (0.1 M sodium cacodylate buffer, pH 7.3), for 2 hours, then washed in three 10 minute changes of buffer C. Specimens were then post-fixed in 1 % osmium tetroxide in buffer C for 45 minutes, then washed in three 10 minute changes of buffer C. These samples were then dehydrated in 50 %, 70 %, 90 % and 100 % normal grade acetones for 10 minutes each, then for a further two 10-minute changes in analar acetone. Samples were then embedded in araldite resin. Sections, 1 µm thick, were cut on a Reichert OMU4 ultramicrotome, stained with Toluidine Blue, and viewed in a light microscope to select suitable areas for investigation. Ultrathin sections, 60 nm thick, were cut from selected areas, stained in uranyl acetate and lead citrate then viewed in a Philips CM120 Transmission electron microscope. Images were taken on a Gatan Orius CCD camera.

**Iodine Assay:** For each culture, 1 ml aliquots were spun down in a tabletop centrifuge at approximately 6000 ×g for 3 minutes at room temperature. Cell pellets were resuspended in 200 µl PBS, to which was added 50 µl of 100 mM CuSO<sub>4</sub>, 50 µl of 6 % v/v H<sub>2</sub>O<sub>2</sub> and 25 µl of 0.2 % Lugol's iodine. Suspensions could be transferred to 48-well plates for imaging with a flatbed scanner. Agar plates growing colonies were flooded with 0.2 % Lugol's iodine solution to test for the presence of starch.

The effect of CuSO<sub>4</sub> and H<sub>2</sub>O<sub>2</sub> on the intensity of the stain was investigated by mixing 1 ml starch solution at different concentrations with 25 µl of 0.2 % Lugol's



375 iodine with or without the prior addition of 50  $\mu$ l of 100 mM CuSO<sub>4</sub> and 50  $\mu$ l of 6 %  
376 v/v H<sub>2</sub>O<sub>2</sub>. The optical density of each culture was measured at 620 nm. The soluble  
377 starch was from Scientific Laboratory Supplies (CHE3620).

378 **Anthrone Assays (Individual):** Washed cell pellets were re-suspended in PBS to the  
379 volume they had been grown. The optical densities of all cultures were equalised. For  
380 each cell suspension, 3 aliquots of 0.33 ml were transferred to microcentrifuge tubes,  
381 and to each was added 0.66 ml Anthrone Reagent (table 1). Standard glucose  
382 concentration solutions (0  $\mu$ g ml<sup>-1</sup>, 2  $\mu$ g ml<sup>-1</sup>, 10  $\mu$ g ml<sup>-1</sup>, 20  $\mu$ g ml<sup>-1</sup>, 50  $\mu$ g ml<sup>-1</sup> and 100  
383  $\mu$ g ml<sup>-1</sup>) were also prepared, and for each standard, 3 aliquots of 0.33 ml was mixed  
384 with 0.66 ml Anthrone Reagent, in order to provide a standard curve of sugar  
385 concentration. The order in which reagent was added to the samples was so arranged  
386 that one set of standard glucose solutions was reacted at the start, in the middle, and at  
387 the end of the assay process. The order in which reagent was added to each set of  
388 culture samples was also alternated. Samples were left on ice for 45 minutes. All  
389 samples were then transferred to standard cuvettes and measured at OD <sub>$\lambda$ 620nm</sub> against the  
390 0  $\mu$ g ml<sup>-1</sup> standard sample in a Hitachi Digilab U-1800 spectrophotometer. The glucose  
391 equivalent hexose sugar concentration for each sample was estimated against the  
392 standard curve of glucose concentrations. Assays therefore measured total hexose sugar  
393 content of the cells as a glucose equivalent.

394 **Starvation Experiment:** At the start of the starvation period, cells that had been  
395 cultured to maximise their polysaccharide content were recovered by centrifugation,  
396 washed and resuspended in M9 with chloramphenicol (40 mg/l) and equalised to an  
397 OD <sub>$\lambda$ 600nm</sub> of 1.5. Each culture was then incubated at 37 °C and 200 rpm, without a  
398 carbon source, and sampled at set time points. At each time point, 3 aliquots of 0.33 ml

399 of each culture were transferred to microcentrifuge tubes and assayed as described  
400 above. Anthrone assays for the starvation experiment therefore measured the total  
401 hexose sugar content of the cultures, to measure how much of the hexose sugar found  
402 within the original washed cell pellets at the start of the experiment was metabolised  
403 over time.

404 **SDS Polyacrylamide Gel Electrophoresis:** Sonicated culture aliquots containing 30 µg  
405 of protein in each case (calculated through Bradford assays) were separated by size on  
406 Mini-Protean TGX™ pre-cast SDS polyacrylamide gels (4 – 15%) at 120 V, according  
407 to BioRad Laboratories instructions.

408 **BioBrick™ construction:** Plasmid construction conforms to the BioBrick RFC10  
409 method, as first described by Knight (34). The *E. coli* strain JM109, the standard  
410 Synthetic Biology plasmid pSB1C3 and the BioBrick BBa\_K523005 (P<sub>LAC</sub>-RBS-LacZ-  
411 RBS) were used for all cloning procedures and the propagation of plasmid DNA. For  
412 *glgC* and *glgC16*, BioBrick parts BBa\_K118015 and BBa\_K118016 (respectively) were  
413 used, giving the genes with *EcoRI* sites removed and the G336D substitution in the case  
414 of *glgC16*. Table 2 shows the primers used to amplify *glgB* and *glgC* from the *E. coli*  
415 chromosome, as well as those used to remove the *EcoRI* sites (*glgCm1* and *glgCm2*).  
416 All restriction enzymes were purchased from New England Biolabs (NEB) and used  
417 according to the manufacturer's instructions.

418

#### 419 **Acknowledgments**

420 This work was supported by the Biotechnology and Biological Sciences Research  
421 Council, grant number BB/F017073/1.

## References

1. Conca J. 2014. It's final - corn ethanol is of no use. Forbes.com.  
<https://www.forbes.com/sites/jamesconca/2014/04/20/its-final-corn-ethanol-is-of-no-use/#>.
2. Belkin B. 2008. Food inflation, riots spark worries for world leaders. WSJ.  
<https://www.wsj.com/articles/SB120813134819111573>
3. Sachs J. 2008. Surging food prices and global stability. *Scientific American* 298:40-40.
4. Fargione J, Hill J, Tilman D, Polasky S, Hawthorne P. 2008. Land clearing and the biofuel carbon debt. *Science* 319:1235-1238.
5. Searchinger T, Heimlich R, Houghton R, Dong F, Elobeid A, Fabiosa J, Tokgoz S, Hayes D, Yu T. 2008. Use of U.S. croplands for biofuels increases greenhouse gases through emissions from land-use change. *Science* 319:1238-1240.
6. Lynd L, Zyl W, McBride J, Laser M. 2005. Consolidated bioprocessing of cellulosic biomass: an update. *Current Opinion in Biotechnology* 16:577-583.
7. Kumar R, Singh S, Singh O. 2008. Bioconversion of lignocellulosic biomass: biochemical and molecular perspectives. *Journal of Industrial Microbiology & Biotechnology* 35:377-391.
8. Wackett L. 2008. Biomass to fuels via microbial transformations. *Current Opinion in Chemical Biology* 12:187-193.
9. Yuan J, Tiller K, Al-Ahmad H, Stewart N, Stewart C. 2008. Plants to power: bioenergy to fuel the future. *Trends in Plant Science* 13:421-429.
10. French C. 2009. Synthetic biology and biomass conversion: a match made in heaven?. *Journal of The Royal Society Interface* 6.

11. Taha M, Foda M, Shahsavari E, Aburto-Medina A, Adetutu E, Ball A. 2016. Commercial feasibility of lignocellulose biodegradation: possibilities and challenges. *Current Opinion in Biotechnology* 38:190-197.
12. Falcón L, Lindvall S, Bauer K, Bergman B, Carpenter E. 2004. Ultrastructure of unicellular N<sub>2</sub>-fixing cyanobacteria from the tropical North Atlantic and subtropical North Pacific oceans. *Journal of Phycology* 40:1074-1078.
13. Deschamps P, Colleoni C, Nakamura Y, Suzuki E, Putaux J, Buleon A, Haebel S, Ritte G, Steup M, Falcon L, Moreira D, Loffelhardt W, Raj J, Plancke C, d'Hulst C, Dauvillee D, Ball S. 2008. Metabolic symbiosis and the birth of the plant kingdom. *Molecular Biology and Evolution* 25:795-795.
14. Ball S, Morell M. 2003. From bacterial glycogen to starch: understanding the biogenesis of the plant starch granule. *Annual Review of Plant Biology* 54:207-233.
15. D'Hulst C, Mérida Á. 2010. The priming of storage glucan synthesis from bacteria to plants: current knowledge and new developments. *New Phytologist* 188:13-21.
16. Smith A. 1999. Making starch. *Current Opinion in Plant Biology* 2:223-229.
17. Smith A. 2001. The biosynthesis of starch granules. *Biomacromolecules* 2:335-341.
18. Zeeman S, Kossmann J, Smith A. 2010. Starch: its metabolism, evolution, and biotechnological modification in plants. *Annual Review of Plant Biology* 61:209-234.
19. Tetlow I. 2006. Understanding storage starch biosynthesis in plants: a means to quality improvement. *Canadian Journal of Botany* 84:1167-1185.
20. Saibene D, Zobel H, Thompson D, Seetharaman K. 2008. Iodine-binding in granular starch: different effects of moisture content for corn and potato starch. *Starch - Stärke* 60:165-173.

21. Yu X. 1996. The complex of amylose and iodine. *Carbohydrate Research* 292:129-141.
22. John M, Schmidt J, Kneifel H. 1983. Iodine—maltosaccharide complexes: relation between chain-length and colour. *Carbohydrate Research* 119:254-257.
23. McGrance S, Cornell H, Rix C. 1998. A simple and rapid colorimetric method for the determination of amylose in starch products. *Starch - Stärke* 50:158-163.
24. Moulay S. 2013. Molecular iodine/polymer complexes. *Journal of Polymer Engineering* 33.
25. Meléndez R, Meléndez-Hevia E, Mas F, Mach J, Cascante M. 1998. Physical constraints in the synthesis of glycogen that influence its structural homogeneity: a two-dimensional approach. *Biophysical Journal* 75:106-114.
26. Ball S, Colleoni C, Cenci U, Raj J, Tirtiaux C. 2011. The evolution of glycogen and starch metabolism in eukaryotes gives molecular clues to understand the establishment of plastid endosymbiosis. *Journal of Experimental Botany* 62:1775-1801.
27. Wilson W, Roach P, Montero M, Baroja-Fernández E, Muñoz F, Eydallin G, Viale A, Pozueta-Romero J. 2010. Regulation of glycogen metabolism in yeast and bacteria. *FEMS Microbiology Reviews* 34:952-985.
28. Govons S, Gentner N, Greenberg E, Preiss J. 1973. Biosynthesis of bacterial glycogen XI. Kinetic characterization of an altered adenosine diphosphate-glucose synthase from a 'glycogen-excess' mutant of *Escherichia coli* B. *Journal of Biological Chemistry* 248:1731-1740.
29. Manonmani H, Kunhi A. 1999. Interference of thiol-compounds with dextrinizing activity assay of  $\alpha$ -amylase by starch-iodine colour reaction: modification of the

method to eliminate this interference. *World Journal of Microbiology and Biotechnology* 15:485-487.

30. Zeeman S, Delatte T, Messerli G, Umhang M, Stettler M, Mettler T, Streb S, Reinhold H, Kötting O. 2007. Starch breakdown: recent discoveries suggest distinct pathways and novel mechanisms. *Functional Plant Biology* 34:465.
31. Mahlow S, Orzechowski S, Fettke J. 2016. Starch phosphorylation: insights and perspectives. *Cellular and Molecular Life Sciences* 73:2753-2764.
32. Chung C, Niemela S, Miller R. 1989. One-step preparation of competent *Escherichia coli*: transformation and storage of bacterial cells in the same solution. *Proceedings of the National Academy of Sciences* 86:2172-2175.
33. Sundberg M, Pfister B, Fulton D, Bischof S, Delatte T, Eicke S, Stettler M, Smith S, Streb S, Zeeman S. 2013. The heteromultimeric debranching enzyme involved in starch synthesis in *Arabidopsis* requires both isoamylase1 and isoamylase2 subunits for complex stability and activity. *PLoS ONE* 8:e75223.
34. Knight, T., 2003. Idempotent vector design for standard assembly of biobricks. Massachusetts inst. of tech Cambridge artificial intelligence lab.

**Table 1:** Growth media and assay solutions

|                                 |                                                                                                                                                                         |
|---------------------------------|-------------------------------------------------------------------------------------------------------------------------------------------------------------------------|
| Modified Kornberg medium        | 3 % Yeast Extract, 2% Lactose, 63 mM K <sub>2</sub> HPO <sub>4</sub> , 62 mM KH <sub>2</sub> PO <sub>4</sub>                                                            |
| M9 salts                        | 28 g Na <sub>2</sub> HPO <sub>4</sub> , 12 g KH <sub>2</sub> PO <sub>4</sub> , 2 g NaCl, 4 g NH <sub>4</sub> Cl; made up to 1 litre with double-distilled sterile water |
| M9 medium                       | 1 × M9 salts, 2 mM MgSO <sub>4</sub> , 100 μM CaCl <sub>2</sub> , 1% lactose, 0.05% yeast extract                                                                       |
| Lysogeny Broth (LB) medium      | 1% Bacto-tryptone, 0.5% Yeast Extract, 1% NaCl; pH adjusted to 7.5 with NaOH                                                                                            |
| Phosphate Buffered Saline (PBS) | 137 mM NaCl, 2.7 mM KCl, 10 mM Na <sub>2</sub> HPO <sub>4</sub> , 1.8 mM KH <sub>2</sub> PO <sub>4</sub> , pH adjusted to 7.4 with HCl                                  |
| Anthrone reagent                | 20 g litre <sup>-1</sup> Anthrone in H <sub>2</sub> SO <sub>4</sub>                                                                                                     |
| Lugol's Iodine                  | 5 % (w/v) Iodine (I <sub>2</sub> ) and 10 % (w/v) Pottasium Iodide (KI) in deionised water. Total iodine content: 130mg/ml                                              |

**Table 2: Primers**

|          |                                                    |
|----------|----------------------------------------------------|
| glgB_F   | ATGAATTCCTTCTAGAGCTCAAGGAGGTAGACAAGCATGT<br>CCGATC |
| glgB_R   | ATCCTGCAGCTACTAGTAGCGAGTTGTGTCATTCTG               |
| glgC_F   | ATGGTTAGTTTAGAGAAGAACGATC                          |
| glgC_R   | TTATTATCGCTCCTGTTTATGCCCTAAC                       |
| glgCm1_F | TGTTGAAAAACCTGCTAACCC                              |
| glgCm1_R | AATTCGATAATTTTATCGTTCTC                            |
| glgCm2_F | CTCATTCTGCAACATTGATTCC                             |
| glgCm2_R | TTCACGCGAACGCGCGAG                                 |

**Table 3: Plasmids**

| Plasmid    | Description                                         | Source    |
|------------|-----------------------------------------------------|-----------|
| pJW-lacZ   | pSB1C3 + lacZ- $\alpha$                             | This work |
| pJW-glgC   | pSB1C3 + lacZ- $\alpha$ + <i>glgC</i>               | This work |
| pJW-glgC16 | pSB1C3 + lacZ- $\alpha$ + <i>glgC16</i>             | This work |
| pJW-glgB   | pSB1C3 + lacZ- $\alpha$ + <i>glgB</i>               | This work |
| pJW-glgCB  | pSB1C3 + lacZ- $\alpha$ + <i>glgC</i> + <i>glgB</i> | This work |



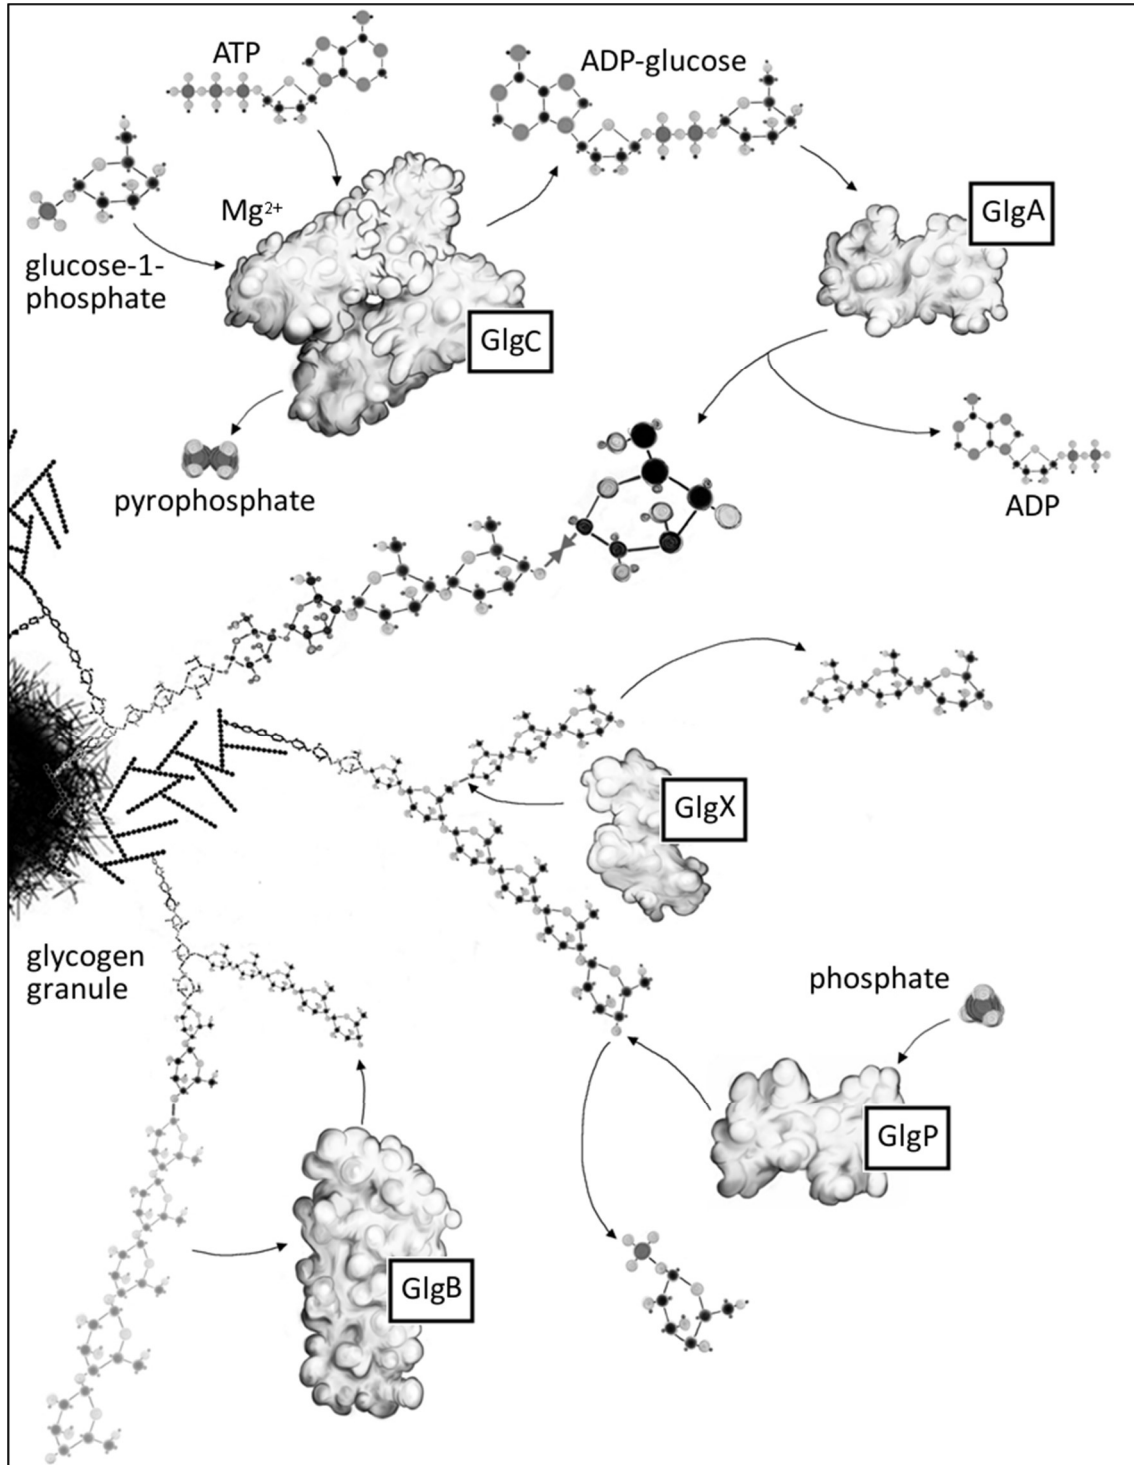

**Figure 1: Glycogen metabolism in *E. coli*.** GlgC and GlgA work in tandem to grow the non-reducing ends of external glucan chains one glucose unit at a time, while GlgP removes glucose residues from the non-reducing ends of the chains, until its activity is cut short by proximity to the branches created by GlgB. GlgX can sever the  $\alpha$ -1,6 bonds at the fork of these branches, but only on branches shorter than those GlgB has originally attached, thereby preventing the enzymes from falling into a futile cycle of successive branching and debranching (Cenci et al., 2014).

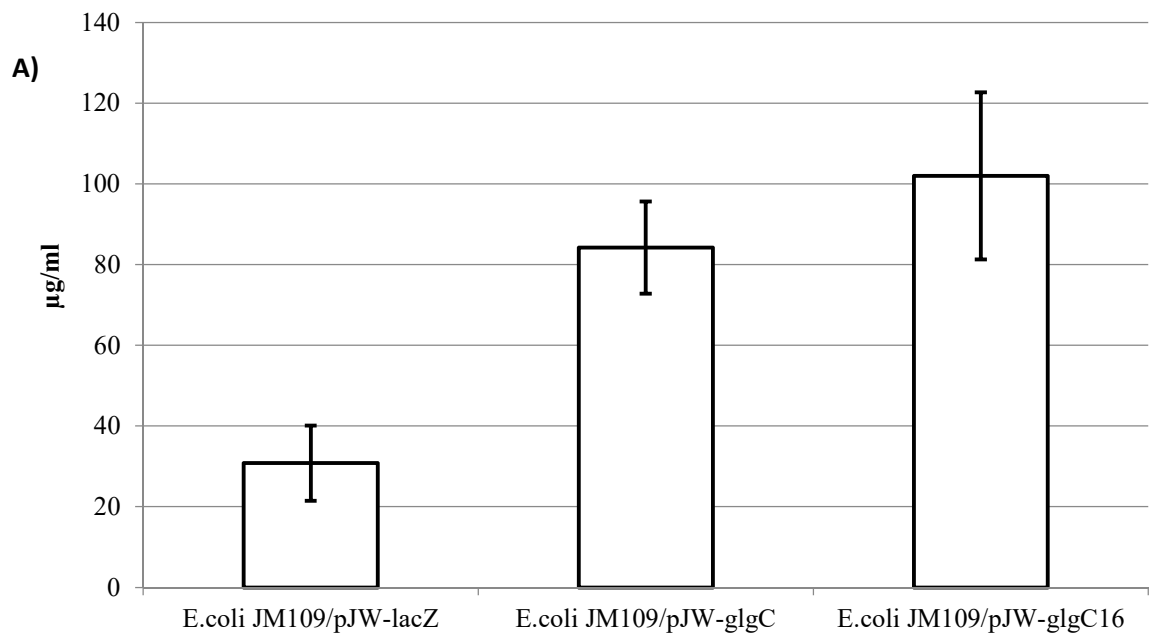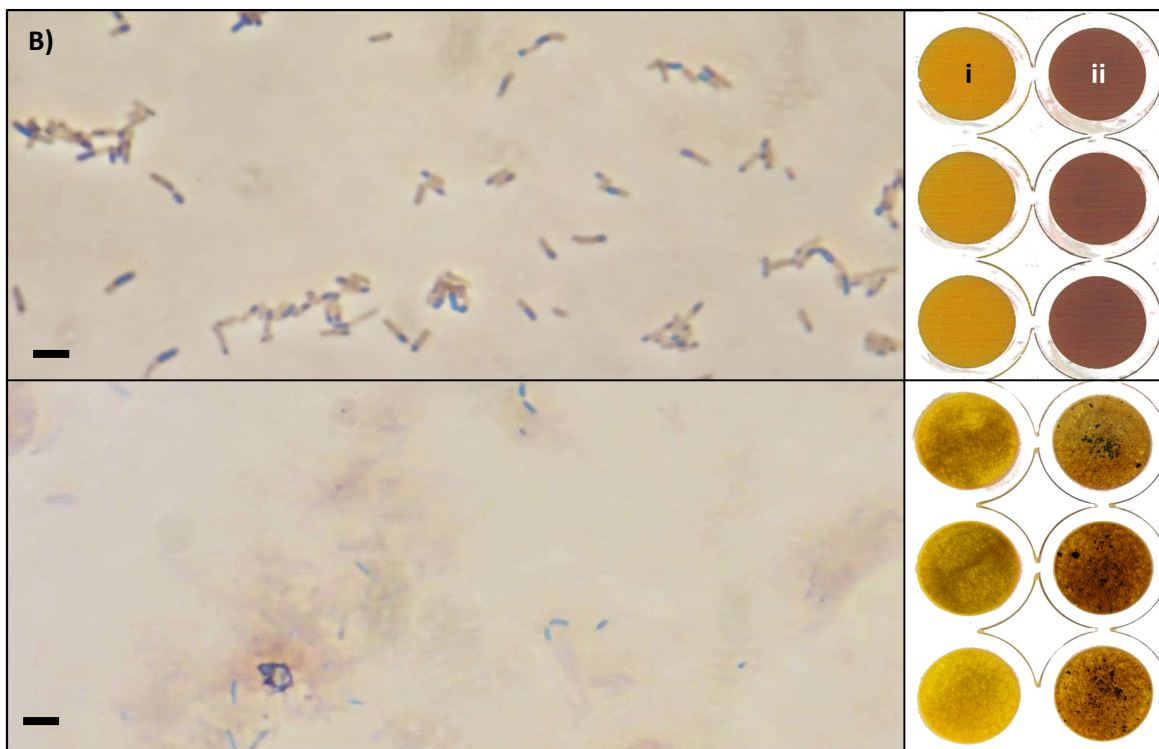

**Figure 2: (A) total hexose sugar content of *E. coli* JM109/pJW-lacZ versus *E. coli* JM109/pJW-glgC and *E. coli* JM109/pJW-glgC16, from anthrone assays performed on cultures grown in a manner expected to maximise their polysaccharide content. Error bars represent the standard error of the mean when n=3. (B) Phase contrast light microscopy showing ‘inclusion body’ phenotype in iodine stained *E. coli* JM109/pJW-glgC16 cells before (top) and after (bottom) lysis with KOH, with iodine assay results of the same cultures, pre and post lysis with KOH. Cultures were grown overnight in LB supplemented with IPTG and 1% lactose. Lysis was achieved with 30% KOH and 5 minutes boiling. Scale bar represents 5  $\mu$ m. Column ‘i’: *E. coli* JM109/pJW-lacZ. Column ‘ii’: *E. coli* JM109/pJW-glgC.**

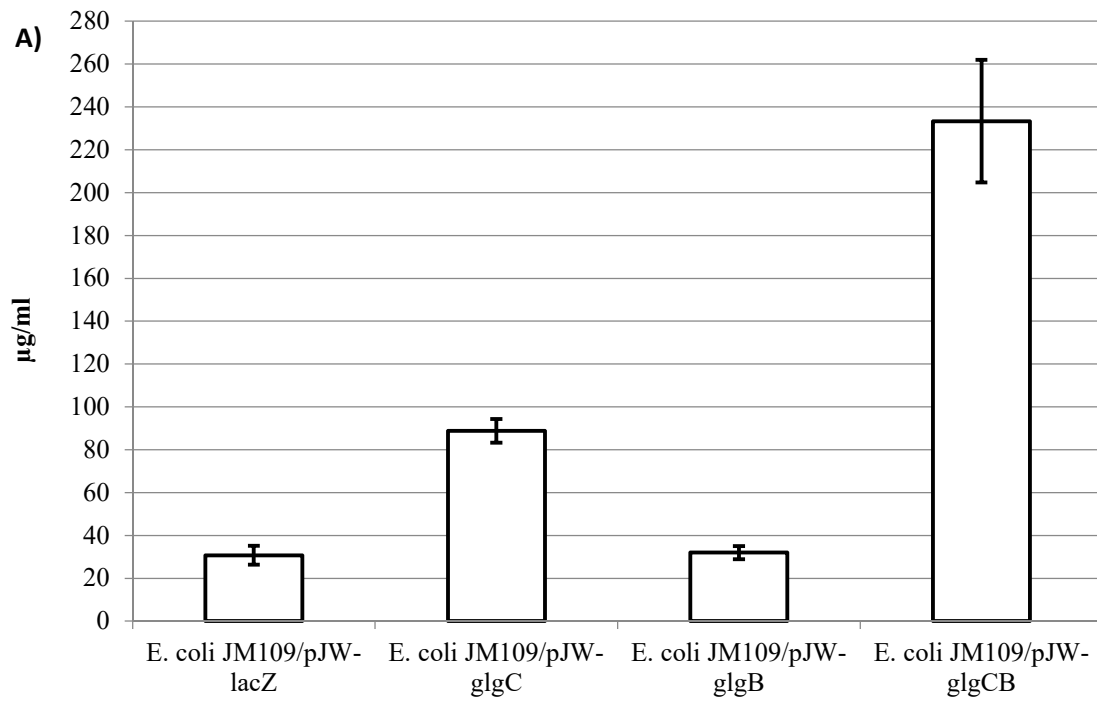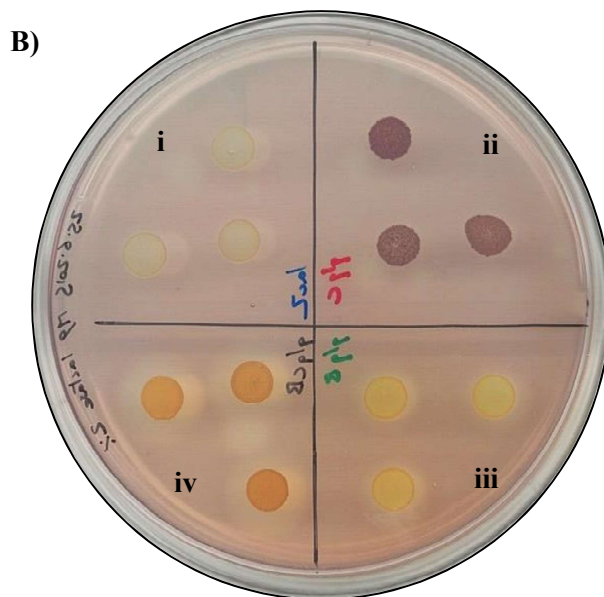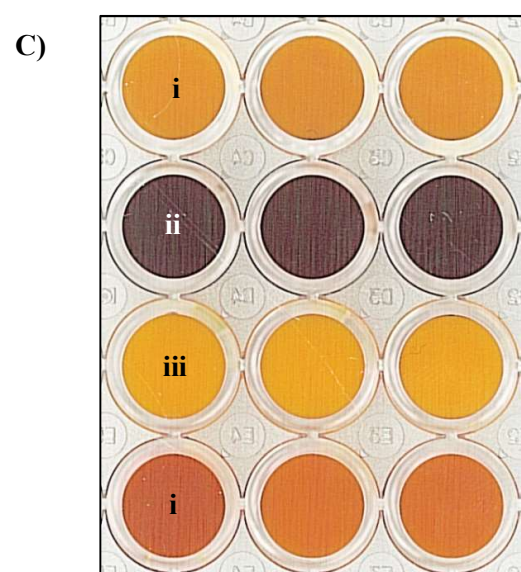

**Figure 3: (A) Total hexose sugar content of transformed JM109 cells.** Anthrone assays performed on cultures equalised to  $OD_{\lambda 600nm}$  3.5, after around 30 hours growth in Kornberg medium followed by M9, in a manner expected to maximise their polysaccharide content. Error bars represent the standard error of the mean when  $n=3$ . **(B & C) Iodine assays of transformed JM109.** B) patches from cultures grown to stationary phase in LB supplemented with lactose & IPTG, spotted onto an M9 plate, grown overnight at 37°C and flooded with Lugol's iodine (0.2%); C) Cell pellets from 1.4 ml of the same cultures used in image B, pelleted and resuspended in 200  $\mu$ l PBS, plus 50  $\mu$ l  $CuSO_4$  (100 mM), 50  $\mu$ l  $H_2O_2$  (6%) and 25  $\mu$ l Lugol's iodine (0.2%), transferred to the wells of a 48-well plate and imaged using a flatbed scanner. i) *E. coli* JM109/pJW-lacZ; ii) *E. coli* JM109/pJW-glgC; iii) *E. coli* JM109/pJW-glgB; iv) *E. coli* JM109/pJW-glgCB.

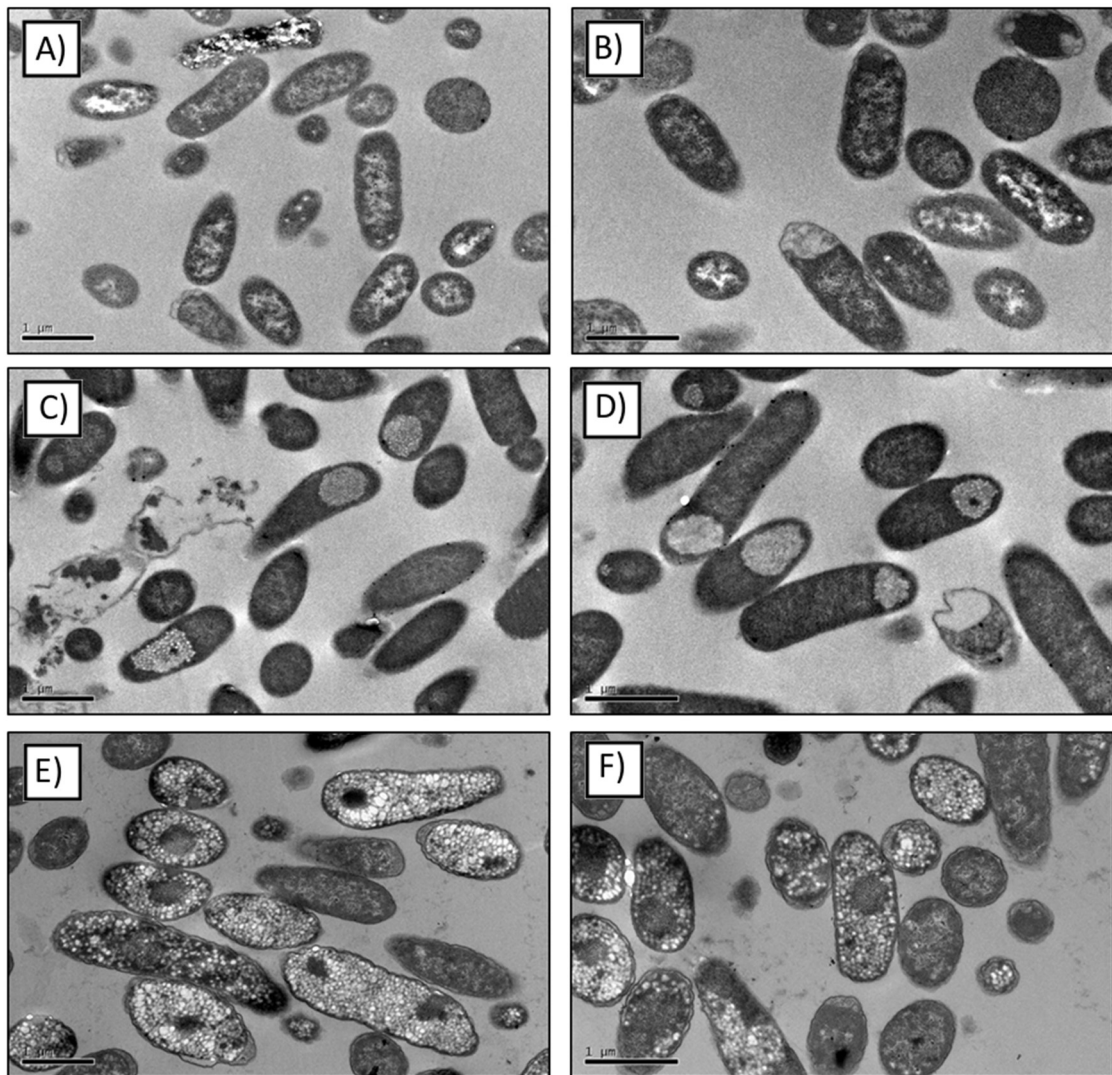

**Figure 4: Transmission electron micrographs (TEMs) of *E. coli* strain JM109 transformed with the pJW-lacZ ‘control’ plasmid (A,B), pJW-glgC16 plasmid (C,D) or pJW-glgCB plasmid (E,F).** Many of the ‘control’ cells show negatively-stained inclusive matter. However, it is considered that the defined granular bodies visible within many of the pJW-glgC16 and pJW-glgCB transformed cells are distinct, both from the control and from each other, and in the case of pJW-glgC16, correspond to those bodies found to stain with iodine when viewed under light microscopy.

Images are selected from 14 pJW-lacZ, 20 pJW-glgC16 and 25 pJW-glgCB transmission electron micrographs captured, and are considered to be representative.



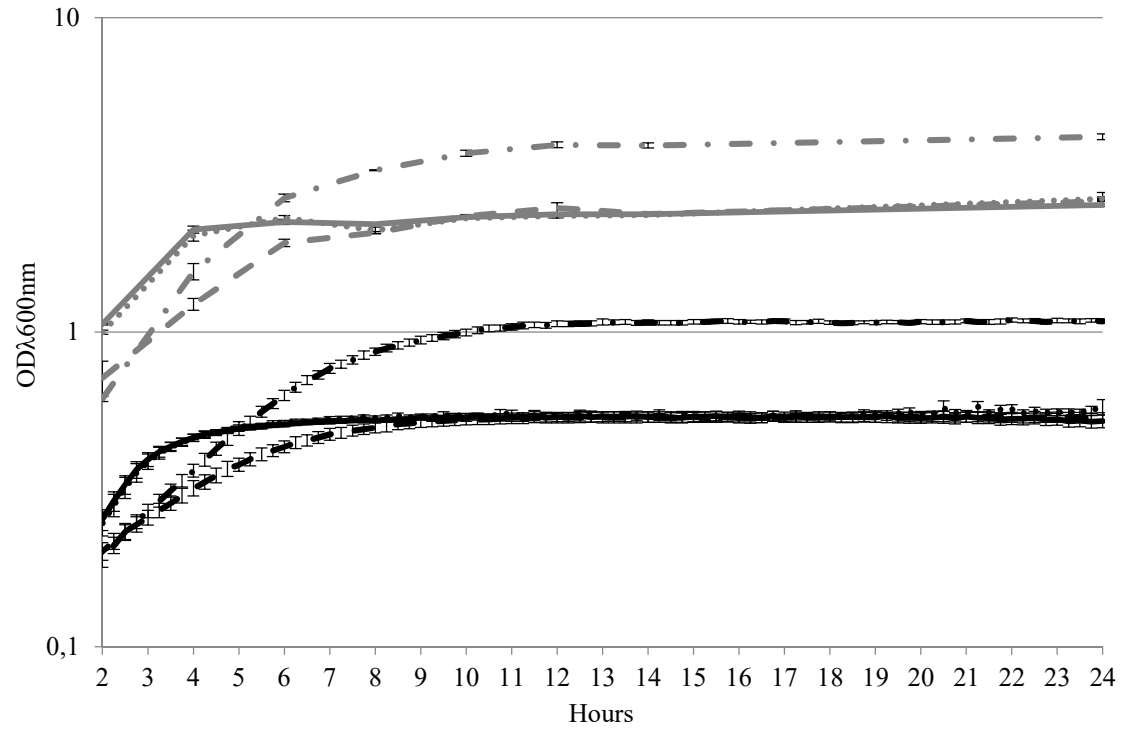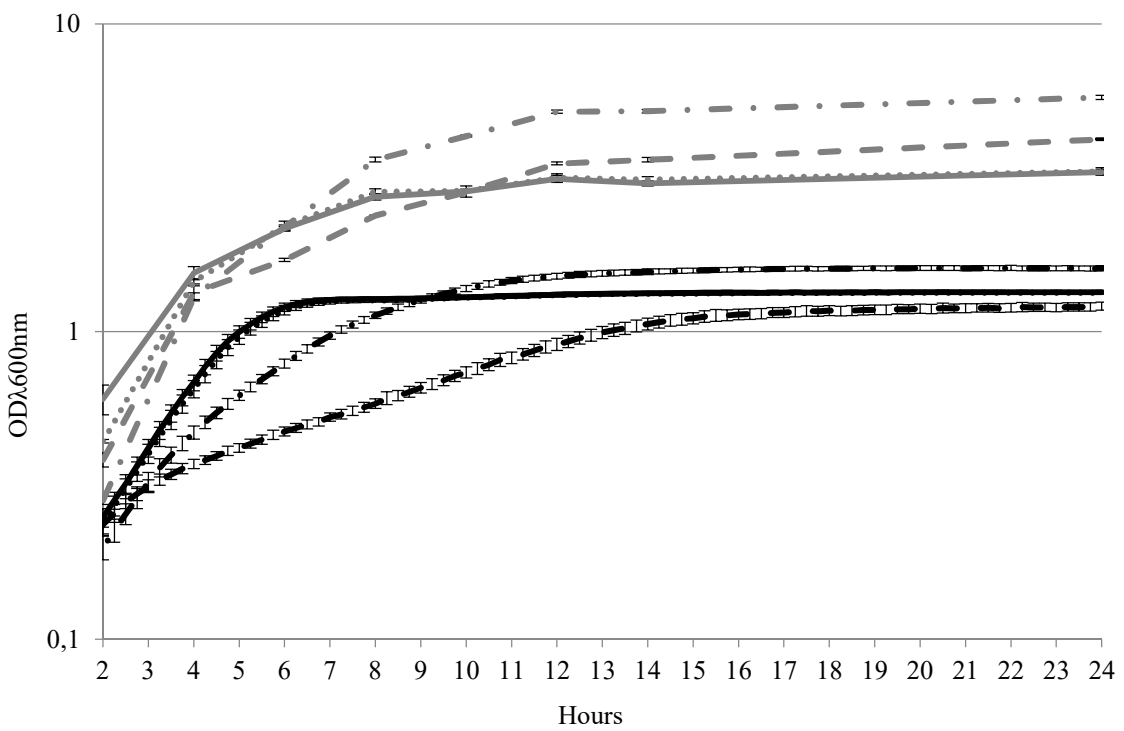

— *E. coli* JM109/pJW-lacZ    - - - *E. coli* JM109/pJW-glgC    ..... *E. coli* JM109/pJW-glgB  
- · · *E. coli* JM109/pJW-glgCB    — *E. coli* JM109/pJW-lacZ    - - - *E. coli* JM109/pJW-glgC  
..... *E. coli* JM109/pJW-glgB    - · · *E. coli* JM109/pJW-glgCB

**Figure 5: Growth curves for the four transformants, grown in LB media (A) or modified Kornberg media (B), supplemented with lactose and IPTG, for 24 hours.** Grey lines show 50 ml shake flask readings. Error bars represent the standard error of the mean when n=3. Black lines show 96-well plate readings from 3 plates. Error bars represent the standard error of the mean when n=6.

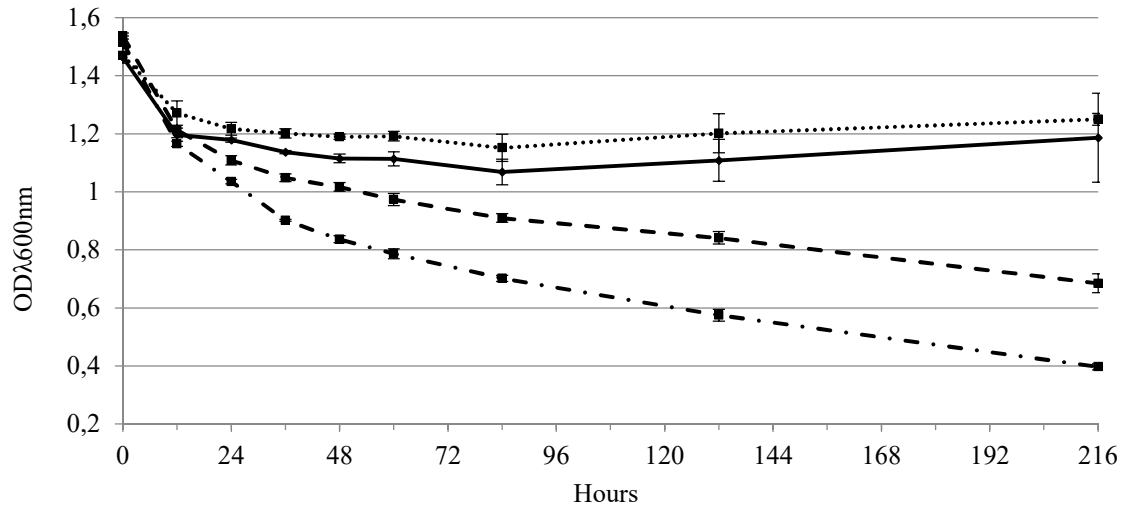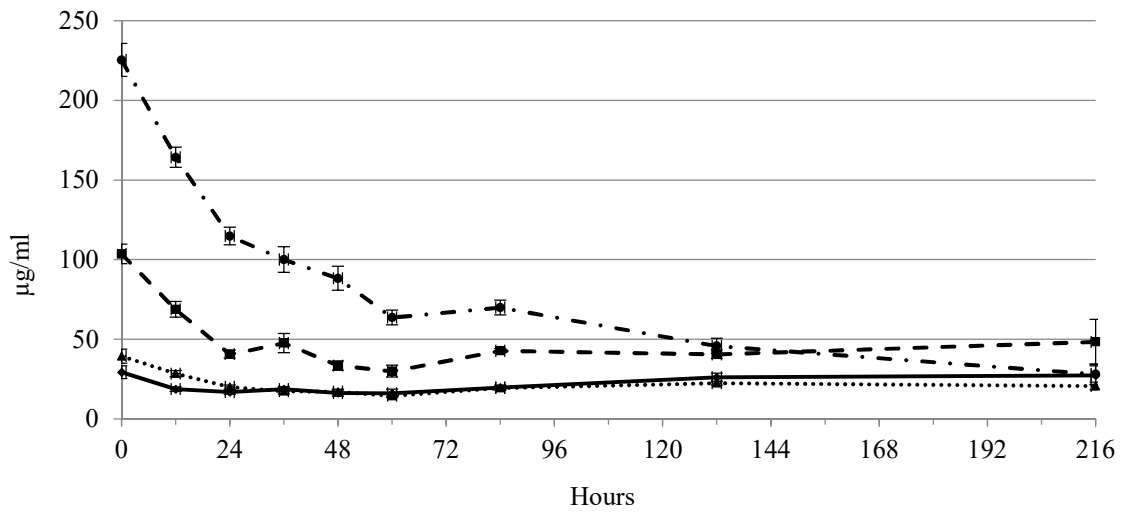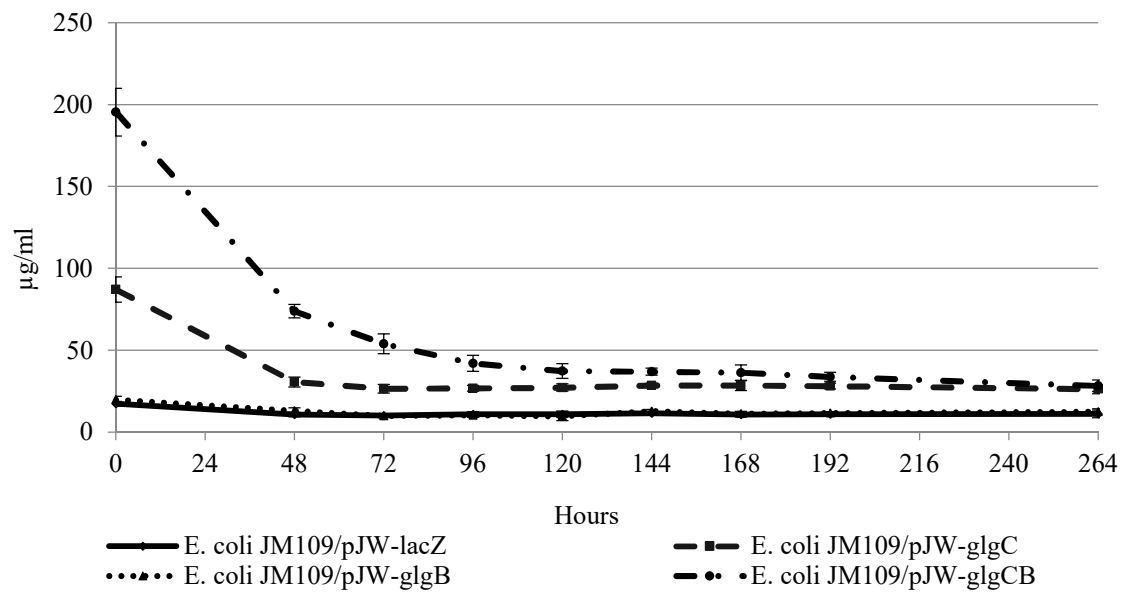

**Figure 6: (A) Growth curves for transformed JM109 over 216 hours of starvation conditions.** Starting from cell densities of  $1.5 \text{ OD}_{\lambda 600\text{nm}}$ . **(B) Total hexose sugar content of cultures over the course of the starvation experiment.** **(C) Repeat of total hexose sugar content experiment.** Error bars represent the standard error of the mean when  $n=3$ .

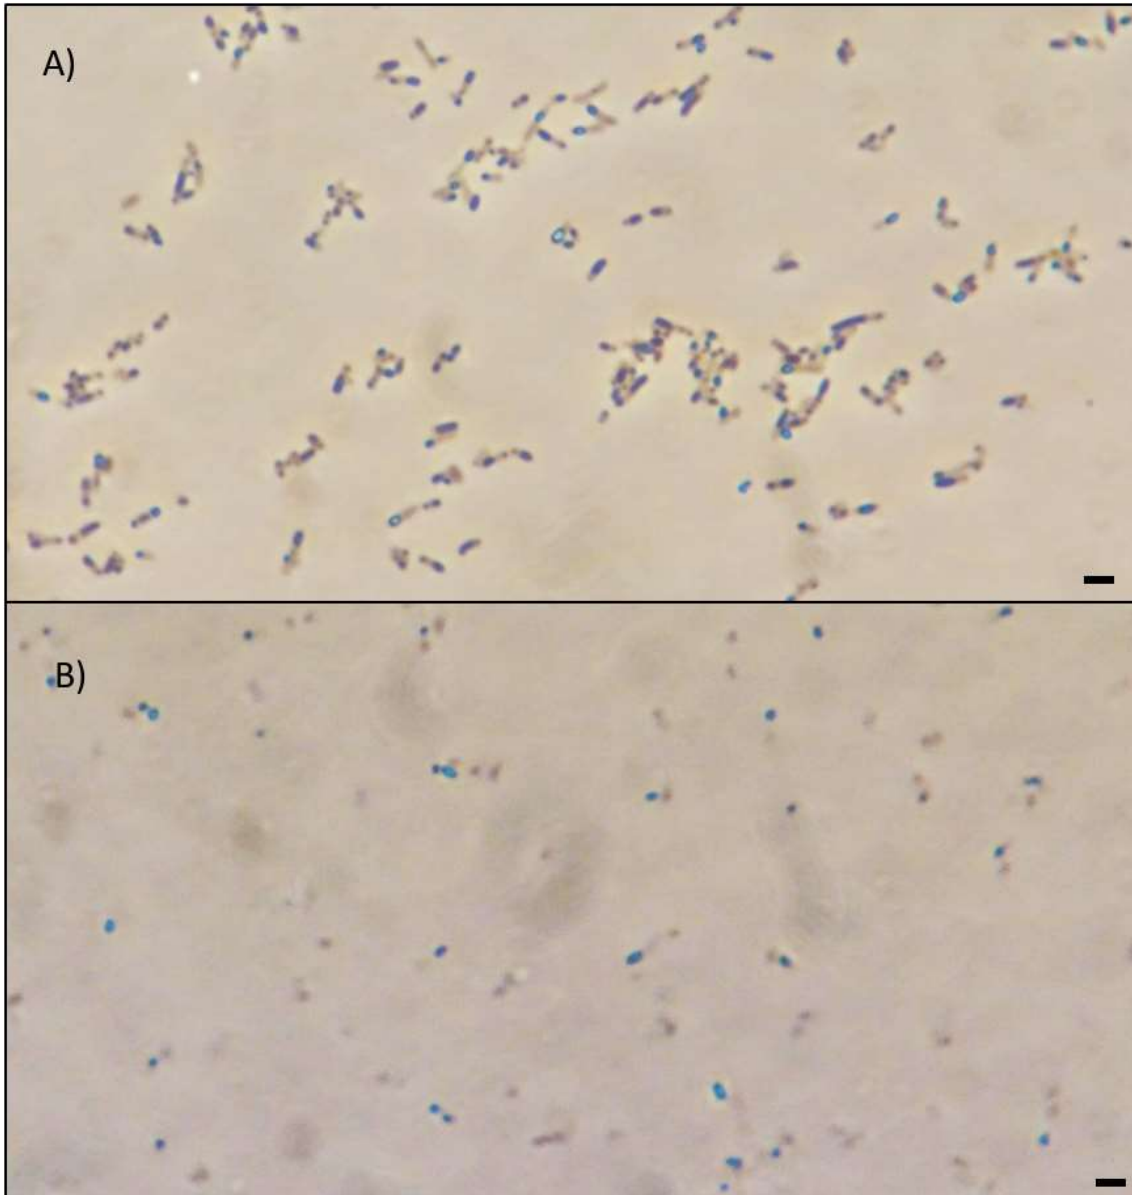

**Figure 7: Light microscopy of iodine stained, *E. coli* JM109/pJW-glgC before and after starvation.** From cultures of *E. coli* JM109/pJW-glgC used in the starvation experiment, imaged on day 1 (A) and day 8 (B), showing clear inclusion bodies in both cases. Scale bar represents 5  $\mu\text{m}$  (approx.)
